# Supplementary material
Source: bioRxiv or medRxiv preprint supplement (https://medrxiv.org/highwire/filestream/88952/field_highwire_adjunct_files/0/2020.07.08.20148841-1.pdf)
Supplement: Supplementary file [file 2020.07.08.20148841-1.pdf]

**Table 2.1. Proportions of negative rRT-PCR assessments on day 14 and median times to negative rRT-PCR results after randomization in the multicenter, retrospective study.**

| Group   | N  | Negative*  | P-value* <sup>1</sup> | Median time to negative<br>(Days, 95% CI) | P-value* <sup>2</sup> |
|---------|----|------------|-----------------------|-------------------------------------------|-----------------------|
| HCQ     | 28 | 12 (42.9%) | 0.70                  | 15 (6,31)                                 | 0.37                  |
| Control | 9  | 5 (55.6%)  |                       | 14 (7,22)                                 |                       |

Abbreviations: HCQ: hydroxychloroquine; CI: confidence interval; \*Negative event: both pharyngeal swab and sputum showed negative results; #Time to negative = Event date or censored date – start day

\*1: Fisher’s exact test; \*2 Log-rank test stratified by clinical syndromes

**Table 3. Comparison of area under curve of Ct value between subjects in the HCQ and SOC groups in the multicenter, open-label, randomized controlled trial**

|                         | HCQ (N=21) |              |                      | SOC (N=12) |              |                      | Treatment difference (95% CI) | Treatment effect, p value <sup>*1</sup> |
|-------------------------|------------|--------------|----------------------|------------|--------------|----------------------|-------------------------------|-----------------------------------------|
|                         | n          | Mean (SD)    | Median (range)       | n          | Mean (SD)    | Median (range)       |                               |                                         |
| Observed data           | 19         | 506.5 (43.7) | 495.2 (424.0, 608.5) | 11         | 501.6 (67.4) | 495.1 (386.6, 594.5) | 4.9 (-36.5, 46.3)             |                                         |
| Least square mean (SE)* |            | 501.7 (18.0) |                      |            | 496.6 (21.1) |                      | 5.1 (-37.1, 47.2)             | 0.81                                    |

Abbreviations: HCQ: hydroxychloroquine; SOC: standard of care; SD: standard deviation; CI: confidence interval;

\*Least Square means based on ANCOVA model with treatment effect.

SE is the standard error corresponding to the LSmean.

\*1: p-value: ANCOVA Model

**Table 4. Comparison of median times and negative viral rRT-PCR results between subjects in the HCQ and SOC groups presenting with mild symptoms in the multicenter, open-label, randomized controlled trial.**

| Group | N  | Negative   | Median time to                          | P-value <sup>*1</sup> |
|-------|----|------------|-----------------------------------------|-----------------------|
|       |    |            | negative <sup>#</sup><br>(Days, 95% CI) |                       |
| HCQ   | 19 | 15 (78.9%) | 5 (1,11)                                | 0.31                  |
| SOC   | 10 | 8 (80.0%)  | 11 (1,12)                               |                       |

Abbreviations: HCQ: hydroxychloroquine; SOC: standard of care; CI: confidence interval;

\*Negative event: both pharyngeal swab and sputum showed negative results; <sup>#</sup>Time to negative = Event date or censored date – start day

\*1: Log-rank test

**Table 5 Comparison of times to clinical recovery between subjects in the HCQ and SOC groups in the multicenter, open-label, randomized controlled trial.**

| Group | N  | Clinical Recovery* | Median time to clinical     | P-value <sup>*1</sup> | P-value <sup>*2</sup> |
|-------|----|--------------------|-----------------------------|-----------------------|-----------------------|
|       |    |                    | recovery<br>(Days, 95% CI)# |                       |                       |
| HCQ   | 21 | 6 (28.6%)          | .(9, .)                     | 0.54                  | 0.51                  |
| SOC   | 12 | 5 (41.7%)          | .(5, .)                     |                       |                       |

Abbreviations: HCQ: hydroxychloroquine; SOC: standard of care; CI: confidence interval;

\*Clinical recovery: 1<sup>st</sup> time of 3 consecutive PCR tests showed negative and major symptoms showed negative; #Time to clinical recovery = Event date or censored date – start day

\*1: Log-rank test

\*2: Log-rank test stratified by clinical syndromes.
